# Supplementary material
Source: publisher site journal article supplement (doi:10.18632/aging.206373)
Supplement: Supplementary file 3 [file aging-v18i1-206373-supplementary-material-SD2.docx]

**Main Authors**

| **Author Name** | **Affiliations** | **Email** |
| --- | --- | --- |
| Suramya Asthana | 1Longevity India, Division of Interdisciplinary Sciences, IISc, Bengaluru 560012  2Department of Developmental Biology and Genetics, Division of Biological Sciences, IISc, Bengaluru 560012 | suramyaa@iisc.ac.in |
| Amruth Deepak Bhat | 1Longevity India, Division of Interdisciplinary Sciences, IISc, Bengaluru 560012  3Department of Bioengineering, Division of Interdisciplinary Sciences, IISc, Bengaluru 560012 | amruthbhat@iisc.ac.in |
| Gayathri Mahadevan | 1Longevity India, Division of Interdisciplinary Sciences, IISc, Bengaluru 560012  2Department of Developmental Biology and Genetics, Division of Biological Sciences, IISc, Bengaluru 560012 | mgayathri@iisc.ac.in |
| Lakshmi Kothegala | 1Longevity India, Division of Interdisciplinary Sciences, IISc, Bengaluru 560012  2Department of Developmental Biology and Genetics, Division of Biological Sciences, IISc, Bengaluru 560012 | lakshmikv@iisc.ac.in |
| Swati Negi | 1Longevity India, Division of Interdisciplinary Sciences, IISc, Bengaluru 560012  2Department of Developmental Biology and Genetics, Division of Biological Sciences, IISc, Bengaluru 560012 | swatinegi@iisc.ac.in |
| Seema Yadav | 1Longevity India, Division of Interdisciplinary Sciences, IISc, Bengaluru 560012  2Department of Developmental Biology and Genetics, Division of Biological Sciences, IISc, Bengaluru 560012 | seema2024@iisc.ac.in |
| Anupama Sudhakaran | 1Longevity India, Division of Interdisciplinary Sciences, IISc, Bengaluru 560012  2Department of Developmental Biology and Genetics, Division of Biological Sciences, IISc, Bengaluru 560012 | anupamas2@iisc.ac.in |
| Annwesha Roy | 1Longevity India, Division of Interdisciplinary Sciences, IISc, Bengaluru 560012  2Department of Developmental Biology and Genetics, Division of Biological Sciences, IISc, Bengaluru 560012 | annwesharoy@iisc.ac.in |
| Meet Makwana | 1Longevity India, Division of Interdisciplinary Sciences, IISc, Bengaluru 560012  2Department of Developmental Biology and Genetics, Division of Biological Sciences, IISc, Bengaluru 560012 | meetchetanb1@iisc.ac.in |
| Rahul Patel | 1Longevity India, Division of Interdisciplinary Sciences, IISc, Bengaluru 560012  2Department of Developmental Biology and Genetics, Division of Biological Sciences, IISc, Bengaluru 560012 | rahulprakas1@iisc.ac.in |
| Harshavardhan Rao B | 4Department of Gastroenterology, MS Ramaiah Medical College, RUAS, Bengaluru 560054 | harshavardhanrao1985  @gmail.com |
| Caroline Elizabeth George | 5Community Health, Palliative Care & Research Division, Bangalore Baptist Hospital, Bengaluru 560032 | carolinelizabethj  @gmail.com |
| Srimonta Gayen | 1Longevity India, Division of Interdisciplinary Sciences, IISc, Bengaluru 560012  2Department of Developmental Biology and Genetics, Division of Biological Sciences, IISc, Bengaluru 560012 | srimonta@iisc.ac.in |
| Shantanu Shukla | 1Longevity India, Division of Interdisciplinary Sciences, IISc, Bengaluru 560012  2Department of Developmental Biology and Genetics, Division of Biological Sciences, IISc, Bengaluru 560012 | sps@iisc.ac.in |
| Siddharth Jhunjhunwala | 1Longevity India, Division of Interdisciplinary Sciences, IISc, Bengaluru 560012  3Department of Bioengineering, Division of Interdisciplinary Sciences, IISc, Bengaluru 560012 | siddharth@iisc.ac.in |
| Prosenjit Sen | 1Longevity India, Division of Interdisciplinary Sciences, IISc, Bengaluru 560012  6Centre for Nano Science and Engineering, Division of Interdisciplinary Sciences, IISc, Bengaluru 560012 | prosenjits@iisc.ac.in |
| Prabhdeep Kaur | 1Longevity India, Division of Interdisciplinary Sciences, IISc, Bengaluru 560012  7Isaac Centre for Public Health, Tata IISc Medical School, IISc, Bengaluru 560012 | pkaur@iisc.ac.in |
| Ramray Bhat | 1Longevity India, Division of Interdisciplinary Sciences, IISc, Bengaluru 560012  2Department of Developmental Biology and Genetics, Division of Biological Sciences, IISc, Bengaluru 560012  3Department of Bioengineering, Division of Interdisciplinary Sciences, IISc, Bengaluru 560012 | ramray@iisc.ac.in |
| Deepak Kumar Saini | 1Longevity India, Division of Interdisciplinary Sciences, IISc, Bengaluru 560012  2Department of Developmental Biology and Genetics, Division of Biological Sciences, IISc, Bengaluru 560012  3Department of Bioengineering, Division of Interdisciplinary Sciences, IISc, Bengaluru 560012 | deepaksaini@iisc.ac.in |

**Contributing Authors**

| **Name** | **Affiliation** | **Email** |
| --- | --- | --- |
| ***Longevity India Team*** | | |
| Ambarish Ghosh | 1Longevity India, Division of Interdisciplinary Sciences, Indian Institute of Science, Bengaluru 560012  6Centre for Nano Science and Engineering, Division of Interdisciplinary Sciences, Indian Institute of Science, Bengaluru 560012  8Department of Physics, Indian Institute of Science, Bangalore 560012, India | ambarish@iisc.ac.in |
| Ananya Sarkar | 1Longevity India, Division of Interdisciplinary Sciences, Indian Institute of Science, Bengaluru 560012  2Department of Developmental Biology and Genetics, Division of Biological Sciences, Indian Institute of Science, Bengaluru 560012 | sananya@iisc.ac.in |
| Anchita Gopikrishnan | 1Longevity India, Division of Interdisciplinary Sciences, Indian Institute of Science, Bengaluru 560012  2Department of Developmental Biology and Genetics, Division of Biological Sciences, Indian Institute of Science, Bengaluru 560012 | anchitag@iisc.ac.in |
| Annapoorni Rangarajan | 1Longevity India, Division of Interdisciplinary Sciences, Indian Institute of Science, Bengaluru 560012  2Department of Developmental Biology and Genetics, Division of Biological Sciences, Indian Institute of Science, Bengaluru 560012 | anu@iisc.ac.in |
| Anuva R | 1Longevity India, Division of Interdisciplinary Sciences, Indian Institute of Science, Bengaluru 560012  9Department of Microbiology and Cell Biology, Division of Biological Sciences, Indian Institute of Science, Bengaluru 560012 | anuvar@iisc.ac.in |
| Arvind Ramanathan | 15Institute for Stem Cell Science and Regenerative Medicine (InStem), Bangalore Life Science Cluster, Bengaluru 560065 | arvind@instem.res.in |
| Ayushi Verma | 1Longevity India, Division of Interdisciplinary Sciences, Indian Institute of Science, Bengaluru 560012  2Department of Developmental Biology and Genetics, Division of Biological Sciences, Indian Institute of Science, Bengaluru 560012 | ayushiv@iisc.ac.in |
| Bishal Singh | 1Longevity India, Division of Interdisciplinary Sciences, Indian Institute of Science, Bengaluru 560012  9Department of Microbiology and Cell Biology, Division of Biological Sciences, Indian Institute of Science, Bengaluru 560012 | bishalsingh@iisc.ac.in |
| Chiranjib Bhattacharya | 1Longevity India, Division of Interdisciplinary Sciences, Indian Institute of Science, Bengaluru 560012  14Department of Computer Science and Automation, Indian Institute of Science, Bengaluru 560012 | chiru@iisc.ac.in |
| Inbasekar C | 1Longevity India, Division of Interdisciplinary Sciences, Indian Institute of Science, Bengaluru 560012  2Department of Developmental Biology and Genetics, Division of Biological Sciences, Indian Institute of Science, Bengaluru 560012 | inbasekarc@iisc.ac.in |
| Jalak Mehta | 1Longevity India, Division of Interdisciplinary Sciences, Indian Institute of Science, Bengaluru 560012  2Department of Developmental Biology and Genetics, Division of Biological Sciences, Indian Institute of Science, Bengaluru 560012 | jalakmehta@iisc.ac.in |
| Jayant Sehgal | 1Longevity India, Division of Interdisciplinary Sciences, Indian Institute of Science, Bengaluru 560012  2Department of Developmental Biology and Genetics, Division of Biological Sciences, Indian Institute of Science, Bengaluru 560012 | jayantsehgal@iisc.ac.in |
| Kaushik Chatterjee | 1Longevity India, Division of Interdisciplinary Sciences, Indian Institute of Science, Bengaluru 560012  3Department of Bioengineering, Division of Interdisciplinary Sciences, Indian Institute of Science, Bengaluru 560012  10Department of Materials Engineering, Indian Institute of Science, Bengaluru 560012 | kchatterjee@iisc.ac.in |
| Mohit Kumar Jolly | 1Longevity India, Division of Interdisciplinary Sciences, Indian Institute of Science, Bengaluru 560012  3Department of Bioengineering, Division of Interdisciplinary Sciences, Indian Institute of Science, Bengaluru 560012 | mkjolly@iisc.ac.in |
| Narendra Dixit | 1Longevity India, Division of Interdisciplinary Sciences, Indian Institute of Science, Bengaluru 560012  3Department of Bioengineering, Division of Interdisciplinary Sciences, Indian Institute of Science, Bengaluru 560012  11Department of Chemical Engineering, Indian Institute of Science, Bengaluru 560012 | narendra@iisc.ac.in |
| Nikhil Gandasi | 1Longevity India, Division of Interdisciplinary Sciences, Indian Institute of Science, Bengaluru 560012  2Department of Developmental Biology and Genetics, Division of Biological Sciences, Indian Institute of Science, Bengaluru 560012 | grnikhil@iisc.ac.in |
| Nischitha Baliga | 1Longevity India, Division of Interdisciplinary Sciences, Indian Institute of Science, Bengaluru 560012  9Department of Microbiology and Cell Biology, Division of Biological Sciences, Indian Institute of Science, Bengaluru 560012 | nischithab@iisc.ac.in |
| Sagarika Prabhakar | 1Longevity India, Division of Interdisciplinary Sciences, Indian Institute of Science, Bengaluru 560012  2Department of Developmental Biology and Genetics, Division of Biological Sciences, Indian Institute of Science, Bengaluru 560012 | sagarikap@iisc.ac.in |
| Sanjeeva Srivastava | 16Department of Biosciences and Bioengineering, Indian Institute of Technology Bombay, Mumbai 400076 | sanjeeva@iitb.ac.in |
| Sanjiv Sambandan | 1Longevity India, Division of Interdisciplinary Sciences, Indian Institute of Science, Bengaluru 560012  13Instrumentation and Applied Physics, Indian Institute of Science, Bengaluru 560012 | sanjiv@iisc.ac.in |
| Shovamayee Maharana | 1Longevity India, Division of Interdisciplinary Sciences, Indian Institute of Science, Bengaluru 560012  9Department of Microbiology and Cell Biology, Division of Biological Sciences, Indian Institute of Science, Bengaluru 560012 | shova@iisc.ac.in |
| Shweta Thakar | 1Longevity India, Division of Interdisciplinary Sciences, Indian Institute of Science, Bengaluru 560012  2Department of Developmental Biology and Genetics, Division of Biological Sciences, Indian Institute of Science, Bengaluru 560012 | shwetapraka1@iisc.ac.in |
| Subba Rao GS | 1Longevity India, Division of Interdisciplinary Sciences, Indian Institute of Science, Bengaluru 560012  9Department of Microbiology and Cell Biology, Division of Biological Sciences, Indian Institute of Science, Bengaluru 560012 | subba@iisc.ac.in |
| Swaminathan S | 1Longevity India, Division of Interdisciplinary Sciences, Indian Institute of Science, Bengaluru 560012  3Department of Bioengineering, Division of Interdisciplinary Sciences, Indian Institute of Science, Bengaluru 560012  12Department of Nephrology, Tata IISc Medical School, Indian Institute of Science, Bengaluru | swami@iisc.ac.in |
| Tavpritesh Sethi | 17Computational Biology, Indraprastha Institute of Information Technology, Delhi 110020 | tavpriteshsethi@iiitd.ac.in |
| Vinod Bhat | 1Longevity India, Division of Interdisciplinary Sciences, Indian Institute of Science, Bengaluru 560012  9Department of Microbiology and Cell Biology, Division of Biological Sciences, Indian Institute of Science, Bengaluru 560012 | vinod.bhat@fsid-iisc.in |
| Vishal Rao US | 18Department of Head and Neck Oncology, HCG Cancer Center, Bengaluru 560027 | drvishalrao@gmail.com |
| Yogesh | 1Longevity India, Division of Interdisciplinary Sciences, Indian Institute of Science, Bengaluru 560012  2Department of Developmental Biology and Genetics, Division of Biological Sciences, Indian Institute of Science, Bengaluru 560012 | yogesh1@iisc.ac.in |
| ***Clinical Partners*** | | |
| Maddipati Tatarao | 5Community Health, Palliative Care & Research Division, Bangalore Baptist Hospital, Bengaluru 560032 | tatarao777@gmail.com |
| Suman Sarah Varghese | 5Community Health, Palliative Care & Research Division, Bangalore Baptist Hospital, Bengaluru 560032 | sumansarah.92@gmail.com |
| Manjula KS | 5Community Health, Palliative Care & Research Division, Bangalore Baptist Hospital, Bengaluru 560032 | manjulaks2014@gmail.com |
| S Praveena | 5Community Health, Palliative Care & Research Division, Bangalore Baptist Hospital, Bengaluru 560032 | praveebio@gmail.com |
| Sharon Rimai | 5Community Health, Palliative Care & Research Division, Bangalore Baptist Hospital, Bengaluru 560032 | sharonrimai1996@gmail.com |
| Shreya Thadigotla | 4Department of Gastroenterology, MS Ramaiah Medical College, RUAS, Bengaluru 560054 | tshreyareddy20@gmail.com |
| Prateek Reddy | 4Department of Gastroenterology, MS Ramaiah Medical College, RUAS, Bengaluru 560054 | prateekreddyt@gmail.com |
| Drashti Godhani | 4Department of Gastroenterology, MS Ramaiah Medical College, RUAS, Bengaluru 560054 | drastigodhani@gmail.com |
| Anagha Pritvi Raj | 4Department of Gastroenterology, MS Ramaiah Medical College, RUAS, Bengaluru 560054 | anagharaj45@gmail.com |
| Bhoomika Y. | 4Department of Gastroenterology, MS Ramaiah Medical College, RUAS, Bengaluru 560054 | bhoomika2708@gmail.com |
| Harshit V. | 4Department of Gastroenterology, MS Ramaiah Medical College, RUAS, Bengaluru 560054 | harshith27v@gmail.com |
| Sathish Babu K.N. | 19Sri Madhusudan Sai Institute of Medical Sciences and Research, Chikkaballapur 562103 | satish.babu@smsimsr.org |
| Phaneendra Mallekavu | 19Sri Madhusudan Sai Institute of Medical Sciences and Research, Chikkaballapur 562103 | phaneendra.ms@smsimsr.org |
| Anil S. Bilimale | 20School of Public Health, JSS Medical College, JSS AHER, Mysuru 570015 | anilbilimale@jssuni.edu.in |
| Sheeba B | 20School of Public Health, JSS Medical College, JSS AHER, Mysuru 570015 | sheebab@jssuni.edu.in |
| Divya K L | 20School of Public Health, JSS Medical College, JSS AHER, Mysuru 570015 | divyakl@jssuni.edu.in |
| Hemanth R | 20School of Public Health, JSS Medical College, JSS AHER, Mysuru 570015 | hemanthhemi902@gmail.com |
| Aishwarya N | 20School of Public Health, JSS Medical College, JSS AHER, Mysuru 570015 | aishwaryanagesh@icloud.com |
| Shreya Gudi | 21Department of Geriatric Medicine, Bangalore Medical College & Research Institute, Bengaluru 560002 | gudishreya@gmail.com |
| Raghvendra BM | 21Department of Geriatric Medicine, Bangalore Medical College & Research Institute, Bengaluru 560002 | drrgbm78@gmail.com |
| Amit Bahuguna | 22Command Hospital, Bengaluru 560007 | afmcrocks@gmail.com |
| D Navya | 22Command Hospital, Bengaluru 560007 | navya.donaparthi@gmail.com |
| Devyani Sapra | 22Command Hospital, Bengaluru 560007 | dvyniz@gmail.com |
| Ashwin P Nair | 22Command Hospital, Bengaluru 560007 | ashwinktm@yahoo.com |
| Vishal Gautam | 22Command Hospital, Bengaluru 560007 | vishalgautam115@gmail.com |
| ***Industry Partners*** | | |
| Jagan L | 23Centenarians Life Sciences Pvt. Ltd. (Decode Age) | jagan.l@decodeage.com |
| Aditi Muglikar | 23Centenarians Life Sciences Pvt. Ltd. (Decode Age) | aditi.m@decodeage.com |
| Darshit Patel | 23Centenarians Life Sciences Pvt. Ltd. (Decode Age) | darshit@decodeage.com |
| John Mulder | 24Diagnoptics Technologies b.v. | j.mulder@diagnoptics.com |
| Tushar Asthana | 25ARCA AI | tushar@arcaai.com |
| Shibu V Ignatious | 25ARCA AI | dr.shibu@arcaai.com |
| Ramya Satish Kumar | 25ARCA AI | ramya@arcaai.com |
| Karthik Iyer | 25ARCA AI | karthik@arcaai.com |
| Rohit Rajan | 25ARCA AI | rohit@arcaai.com |
| Gaurav Agarwal | 26TATA 1mg Labs | gaurava@1mg.com |
| Shanmugam RK | 26TATA 1mg Labs | shanmugam.rk@1mg.com |
| Prashant Nag | 26TATA 1mg Labs | prashant.nag@1mg.com |
| Arpita Roy Dam | 26TATA 1mg Labs | Arpita.dam@1mg.com |
| Vinisha Nahata | 26TATA 1mg Labs | vinisha.nahata@1mg.com |
| Swati Gupta | 26TATA 1mg Labs | Swati.gupta@1mg.com |
| Vandana Lal | 27Lal Path Labs | vandana.lal@lalpathlabs.com |
| Alok Sharma | 27Lal Path Labs | alok.sharma@lalpathlabs.com |
| Archana Grover | 27Lal Path Labs | archana.grover@lalpathlabs.com |
